# Supplementary material for: Iron regulatory proteins 1 and 2 have opposing roles in regulating inflammation in bacterial orchitis
Source: JCI journal article supplement (doi:10.1172/jci.insight.175845), 2024-02-01

# Full unedited gels for Figure 2A. Left panel

TLR4                      Irp1-/-                      WT  
+   +   -   -   +   +   -   -   UPEC

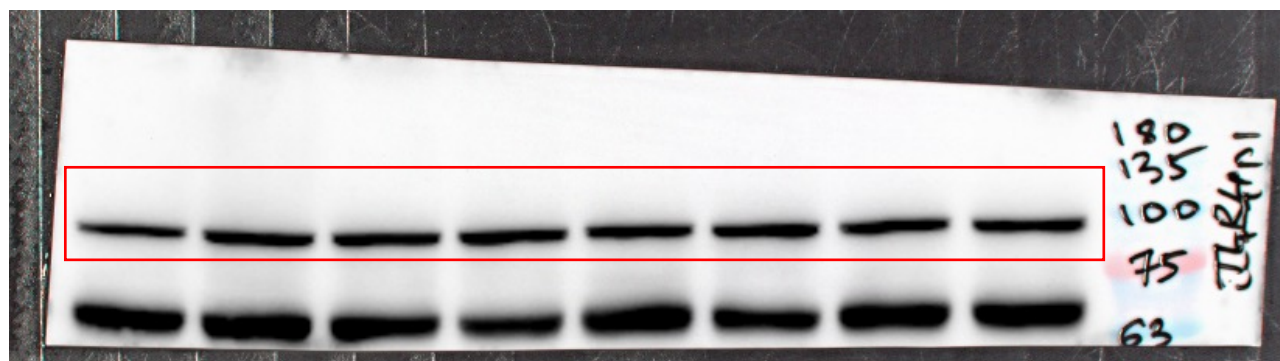

p-ERK

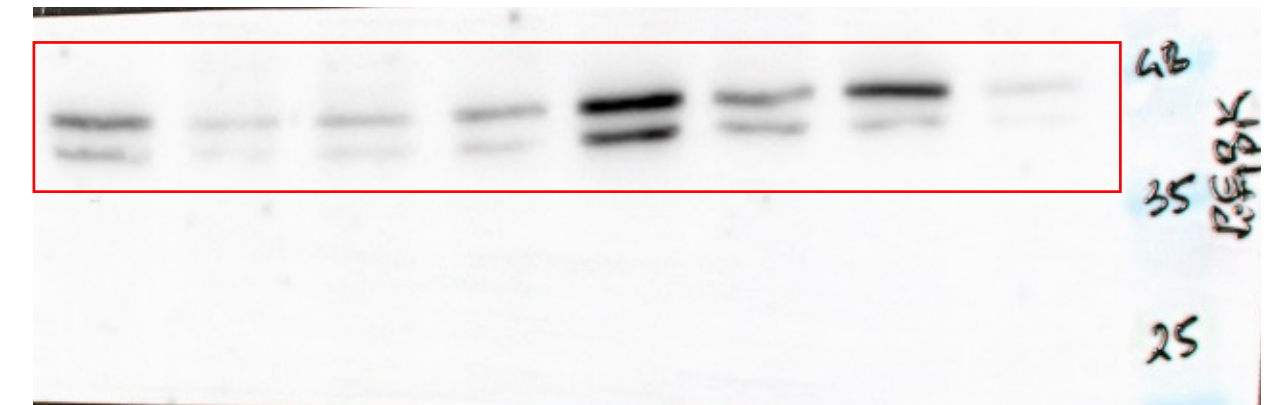

ERK                      Irp1-/-                      WT  
+   +   -   -   +   +   -   -   UPEC

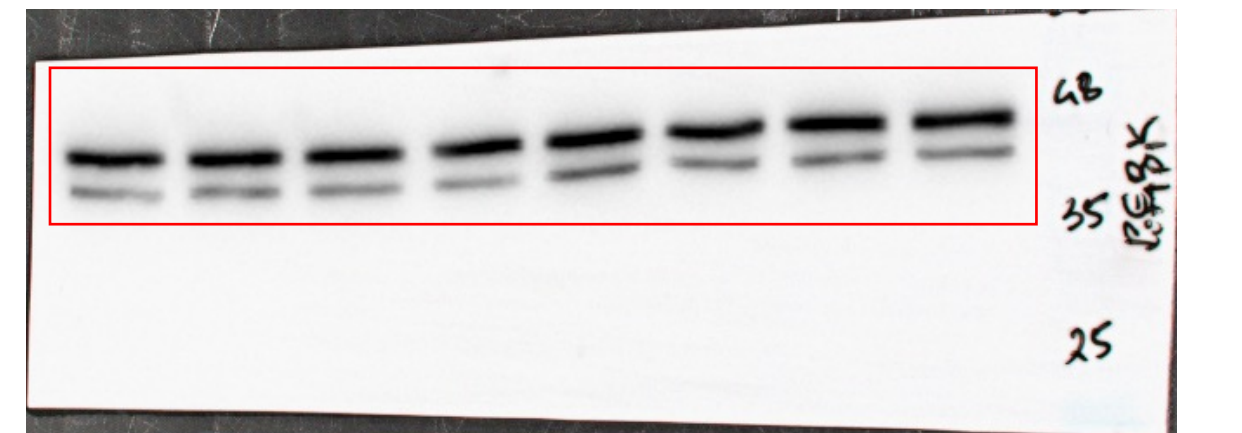

# Full unedited gels for Figure 2A. Left panel

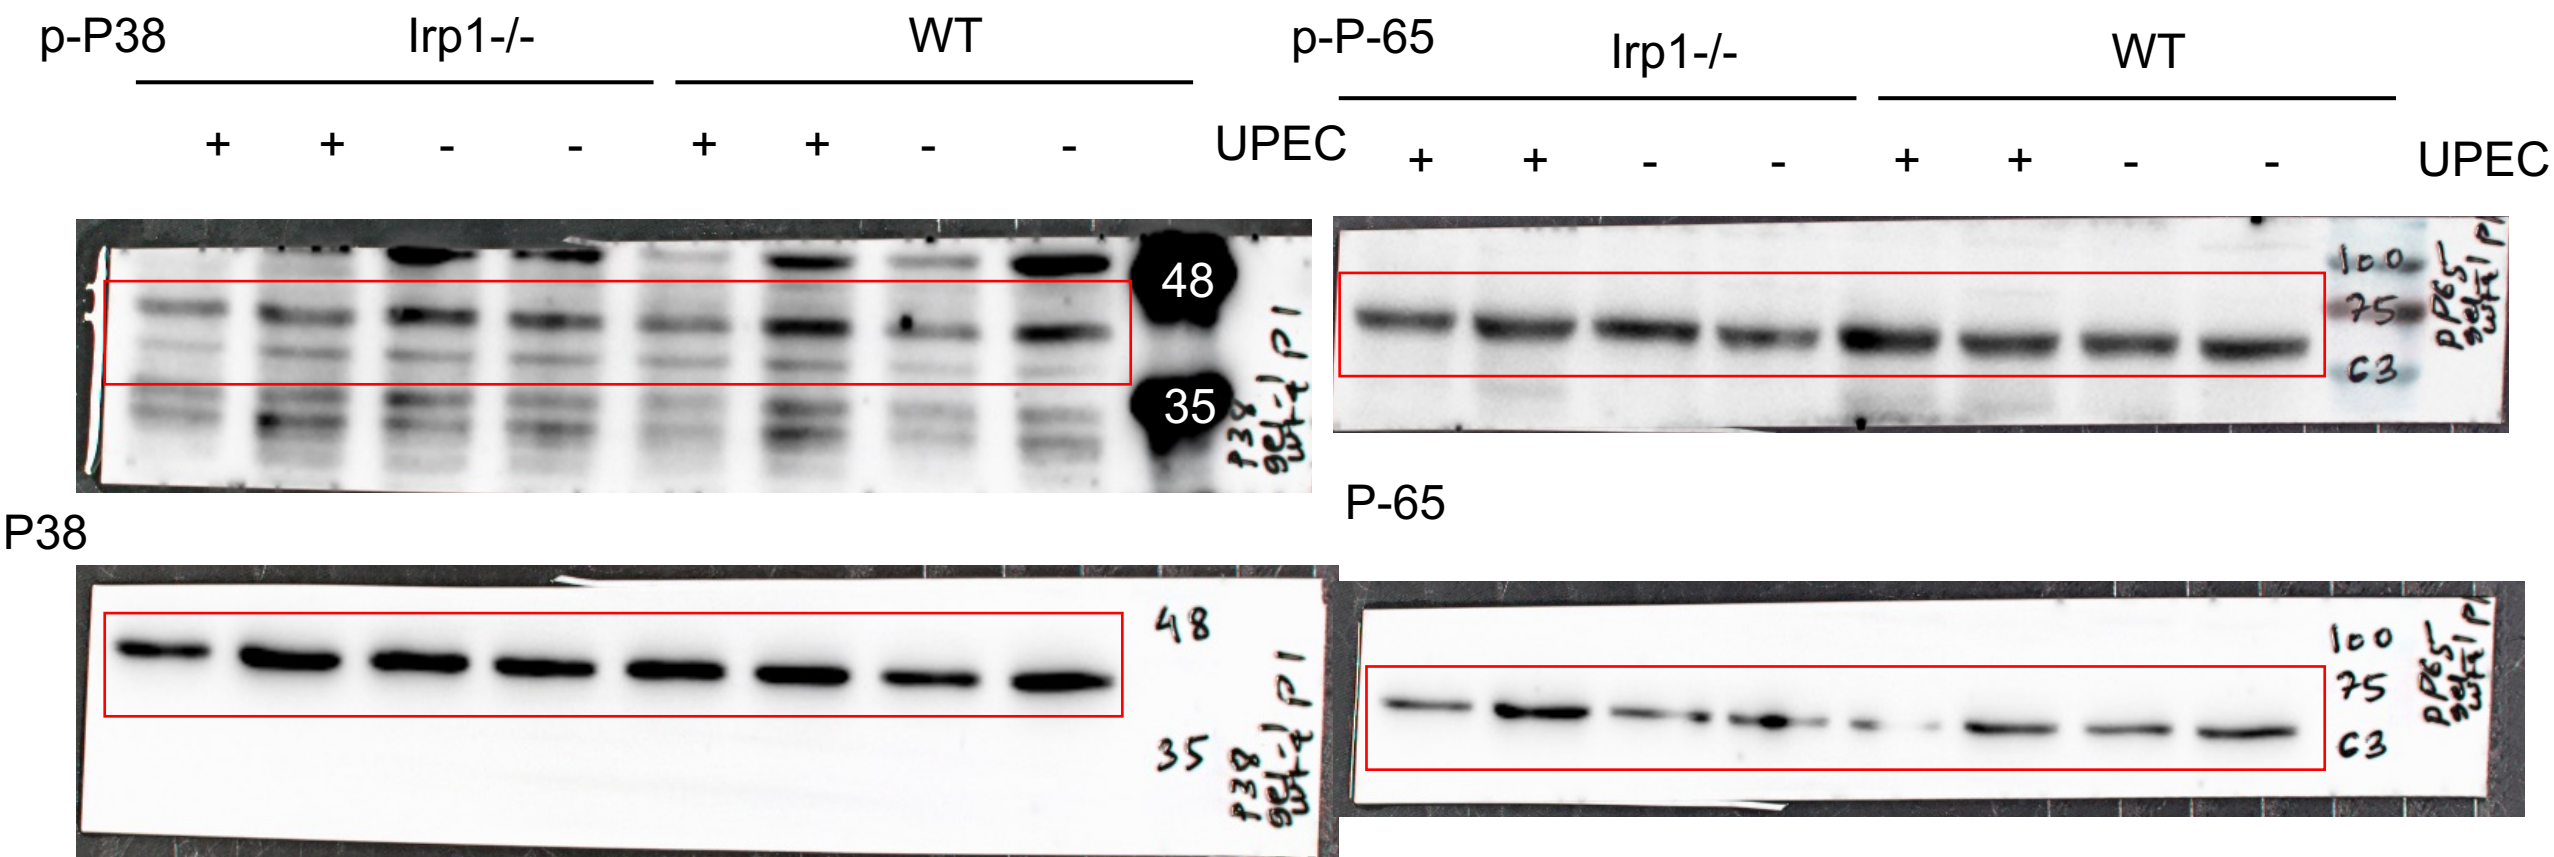

# Full unedited gels for Figure 2A. Right panel

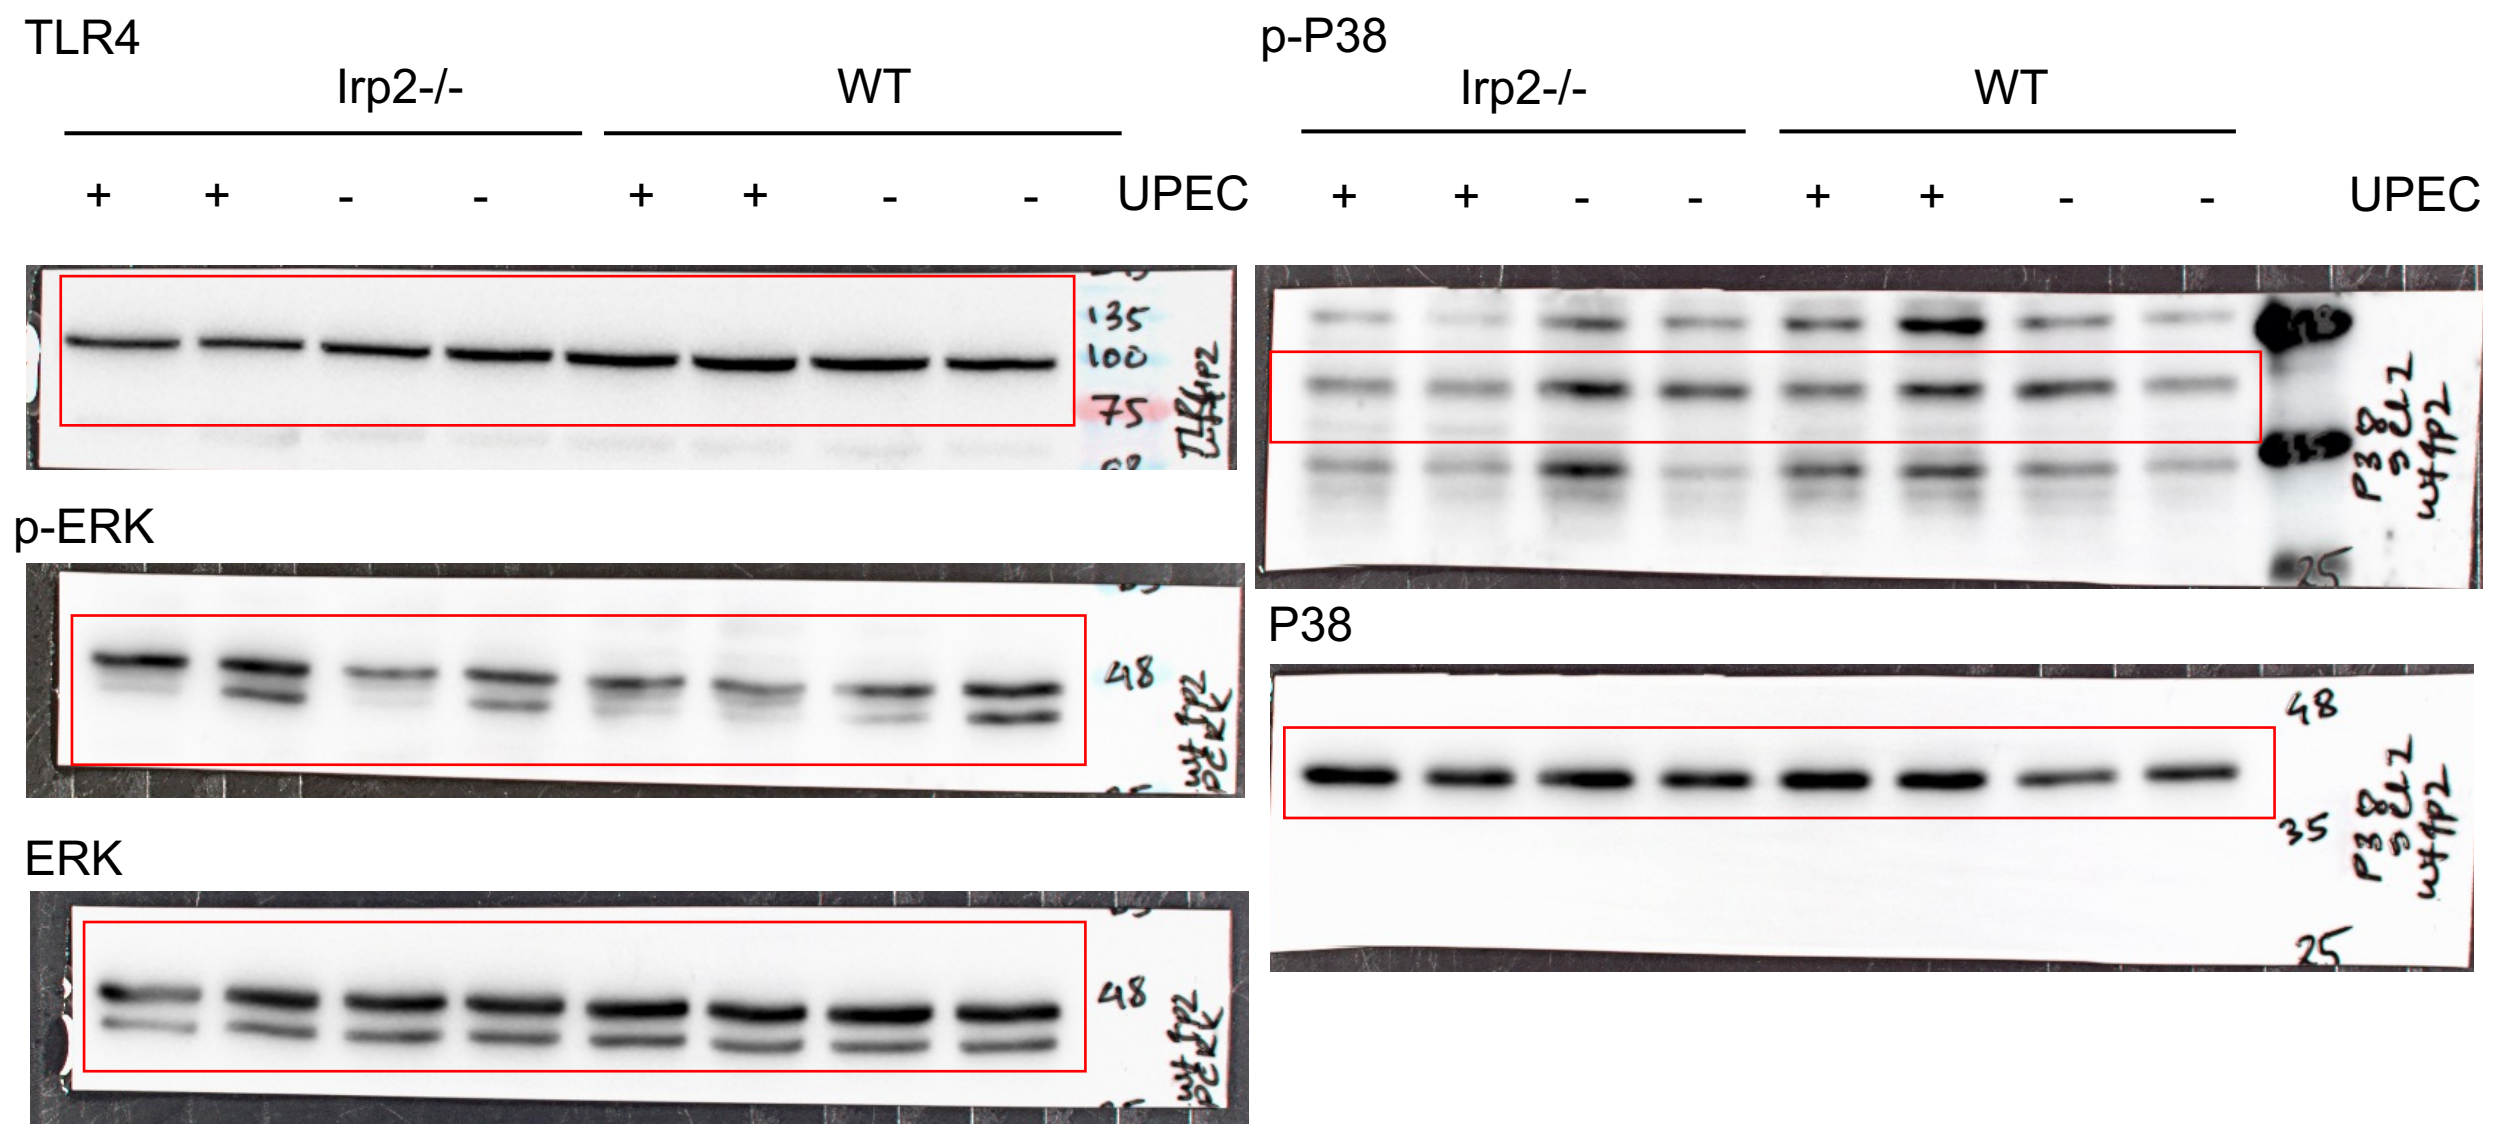

# Full unedited gels for Figure 2A. Right panel

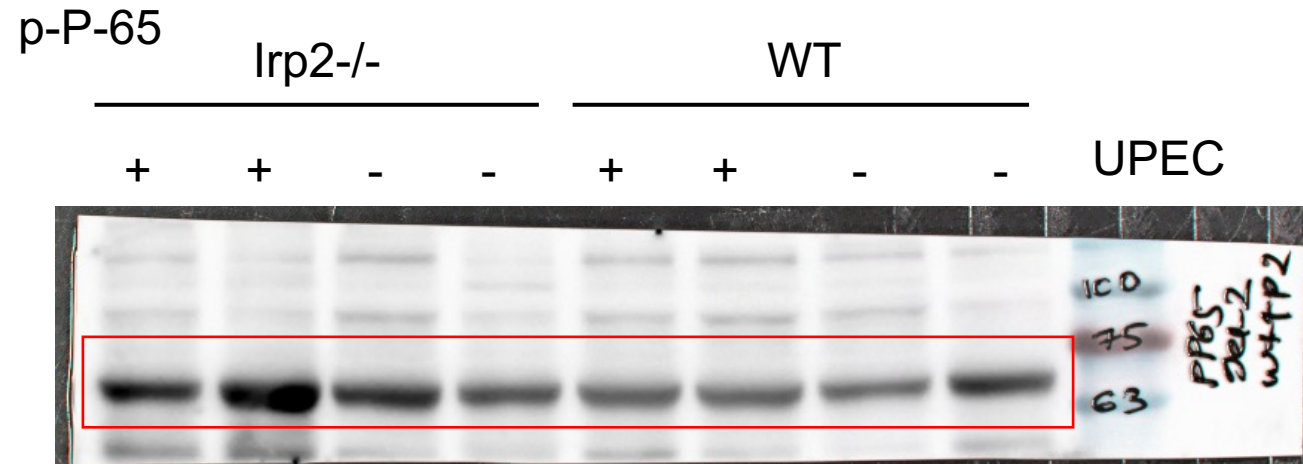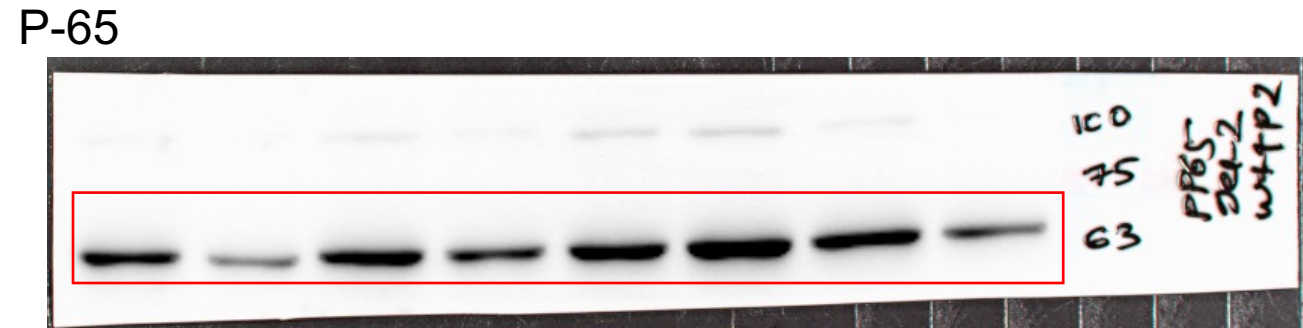

# Full unedited gels for Figure 2C.

| TLR4      | WT |    |    |    | Irp1-/- |    |    |    | Irp2-/- |    |    |    |
|-----------|----|----|----|----|---------|----|----|----|---------|----|----|----|
| LPS (min) | 0  | 20 | 40 | 60 | 0       | 20 | 40 | 60 | 0       | 20 | 40 | 60 |

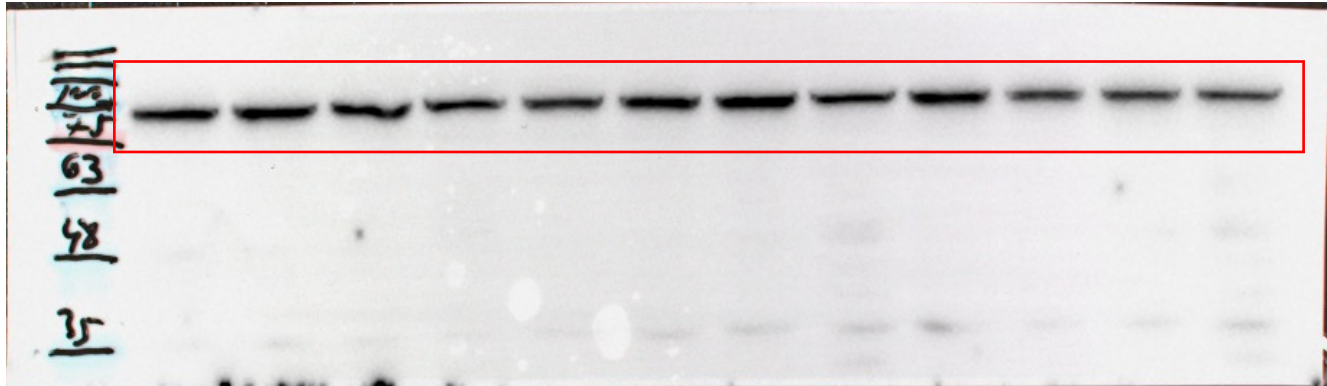

p-ERK

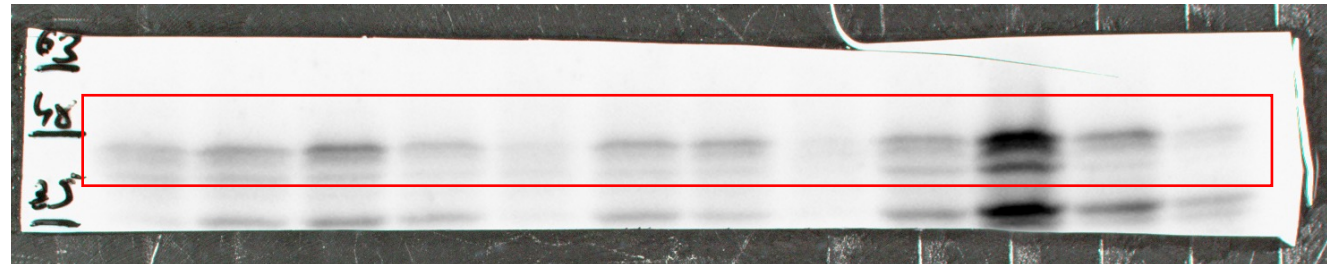

ERK

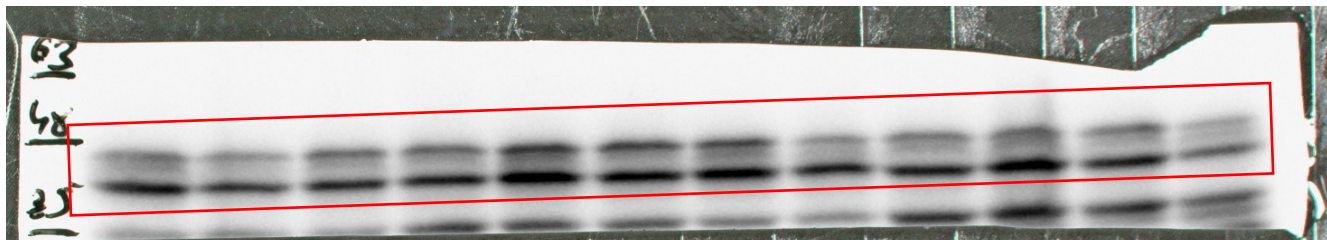

Full unedited gels for Figure 2C.

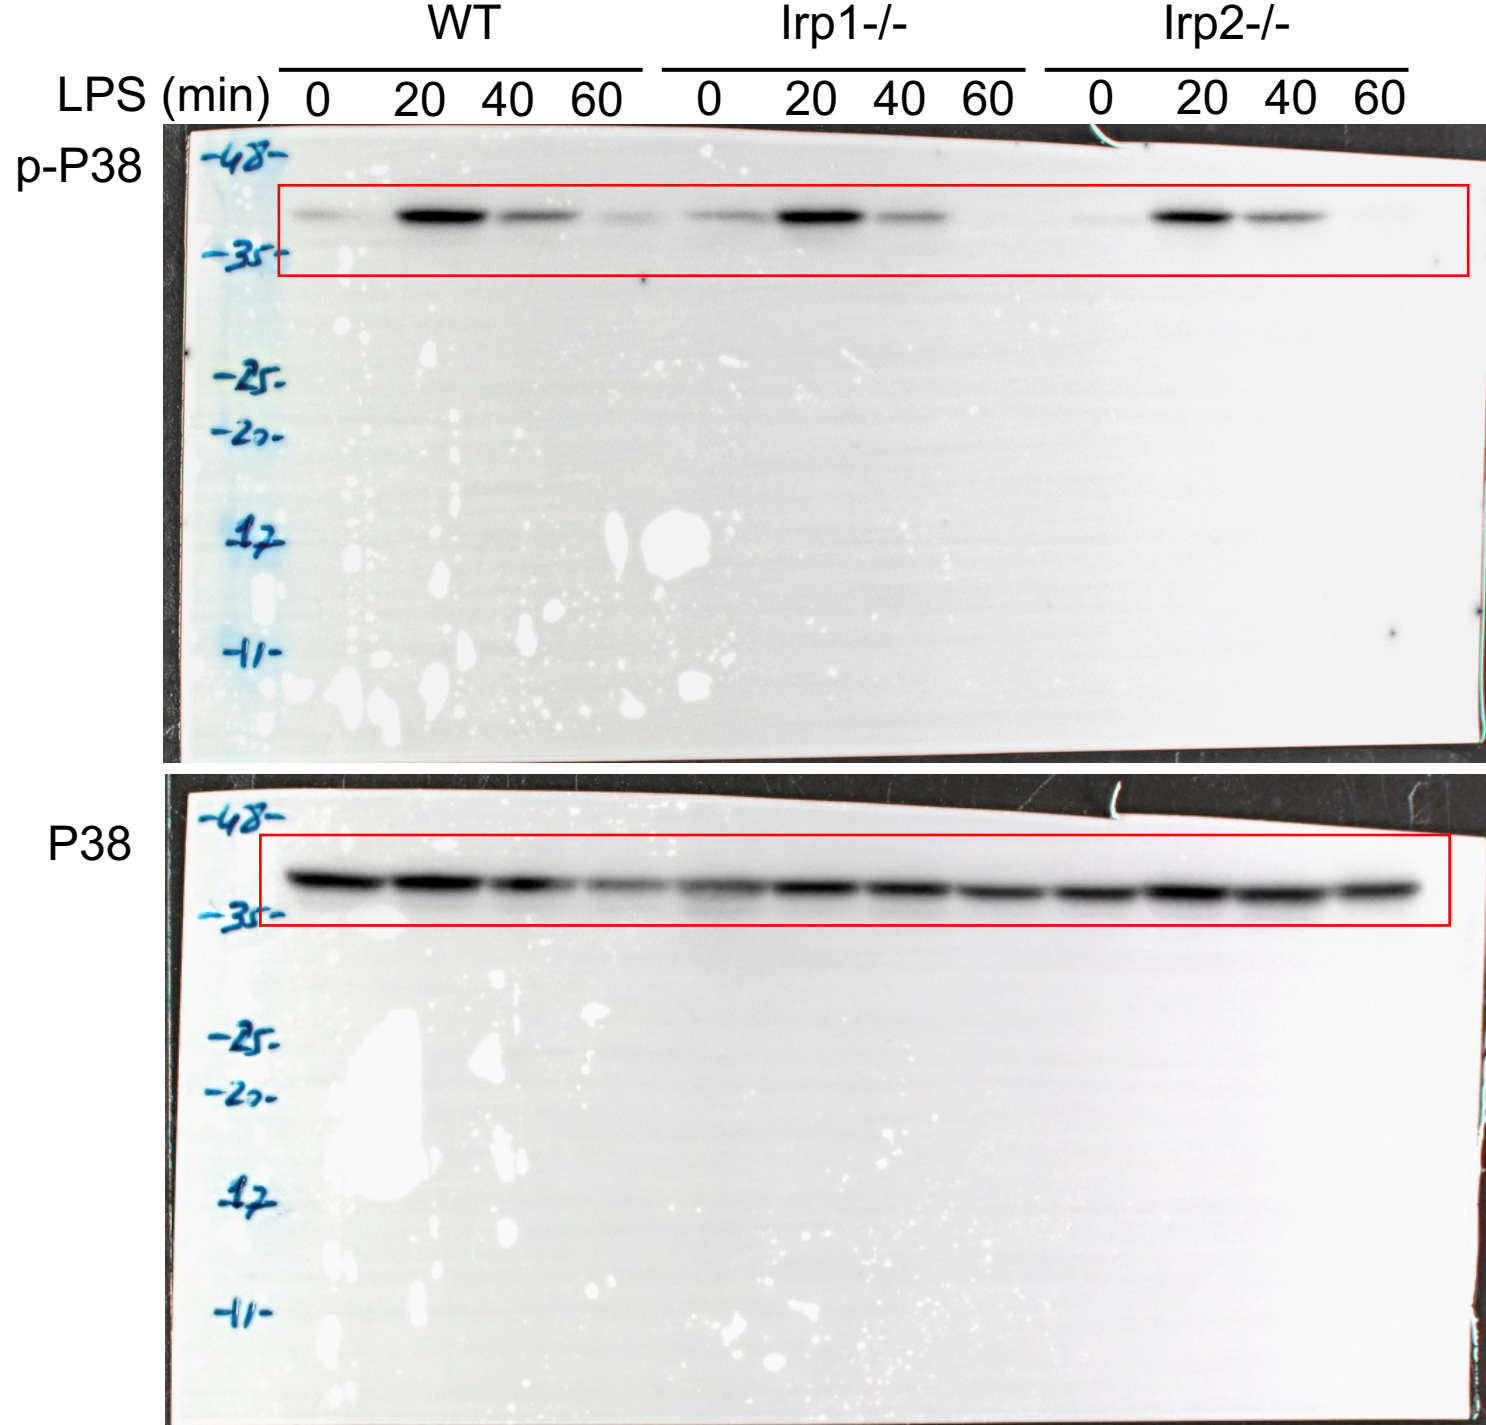

Supplement: sd2 [file 2]
